# Supplementary material for: Measurement report: Inland ship emissions and their contribution to NO x and ultrafine particle concentrations at the Rhine
Source: Copernicus journal article supplement (doi:10.5194/egusphere-2023-535), 2023-05-05
Supplement: Supplementary file 1 [file egusphere-2023-535-supplement.pdf]

## Supplement

**Table S1:** Emission limits set by the CCNR (CCNR, 2022) and the EU (European Union, 2016) in comparison with mean emission factors from this study (measured at BRI).

| Emission standard   | Valid from year | NO <sub>x</sub> limit (g kWh <sup>-1</sup> ) | <i>E</i> <sub>NO<sub>x</sub></sub> (this study) | PM limit (g kWh <sup>-1</sup> ) | <i>E</i> <sub>PM</sub> (this study) | PNC limit (10 <sup>12</sup> particles kWh <sup>-1</sup> ) |
|---------------------|-----------------|----------------------------------------------|-------------------------------------------------|---------------------------------|-------------------------------------|-----------------------------------------------------------|
| none                | ≤ 2003          | none                                         |                                                 | none                            |                                     | none                                                      |
| CCNR I              | > 2003          | 9.2                                          | 8.9 ± 3.2                                       | 0.54                            | 0.35 ± 0.21                         | none                                                      |
| CCNR II             | > 2007          | 6                                            | 8.7 ± 3.2                                       | 0.2                             | 0.41 ± 0.20                         | none                                                      |
| Euro IIIa           | > 2007          | 6                                            | 7.0 ± 2.5                                       | 0.2                             | 0.44 ± 0.28                         | none                                                      |
| Euro V <sup>a</sup> | > 2020          |                                              | 0.6 ± 0.5                                       |                                 | 0.01 ± 0.02                         |                                                           |
| IWP/IWA             |                 | 1.8                                          |                                                 | 0.015                           |                                     | 1                                                         |
| NRE, P<560kW        |                 | 0.4                                          |                                                 | 0.015                           |                                     | 1                                                         |
| Euro VI marinized   |                 | 0.4                                          |                                                 | 0.01                            |                                     | 0.8                                                       |

- 5 <sup>a</sup>Subcategories according to EU 2016/1628: IWP/IWA = motors certified for inland ships. NRE = motors for non-road mobile machines. Marinized = marinized motors from heavy-duty vehicles.

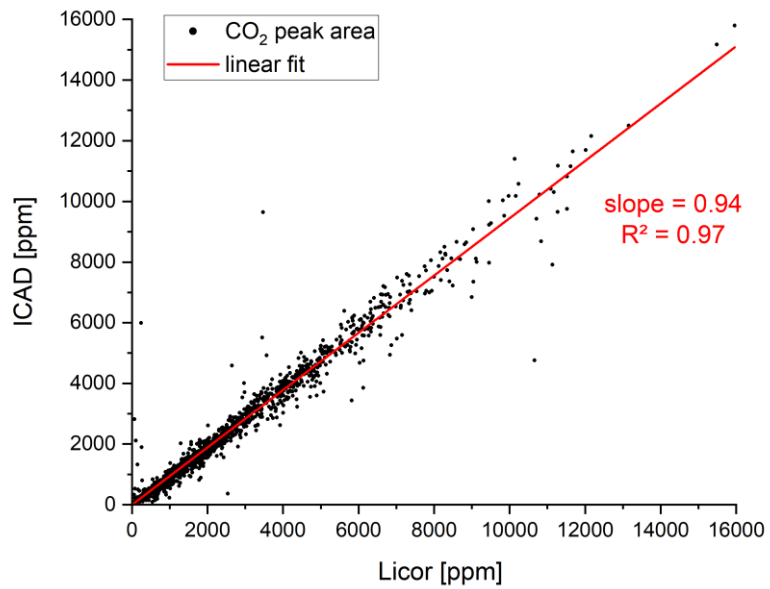

**Figure S1:** Correlation plot of CO<sub>2</sub> peak areas derived from Licor and ICAD measurements at BRI.

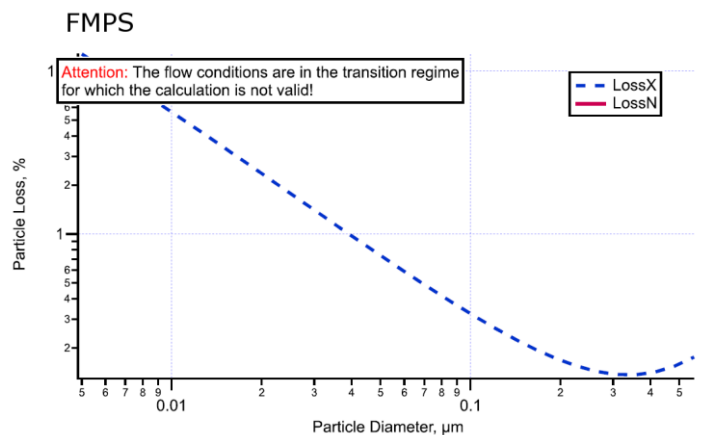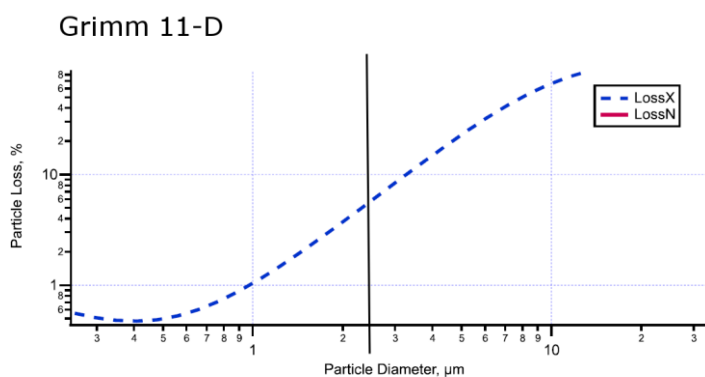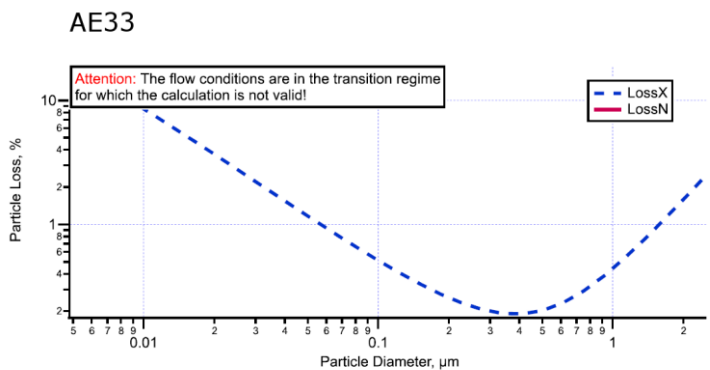

5

**Figure S2:** Calculated overall transmission losses for the instruments FMPS, Grimm 11-D and AE33, derived using the Particle Loss Calculator Tool (von der Weiden et al., 2009). To carry out calculations in the transition regime between laminar and turbulent flow ( $2000 < \text{Re} < 4000$ ) laminar equations were extended to this regime. The results marked with an info box have a lower precision but still provide useful estimates of occurring losses.

10

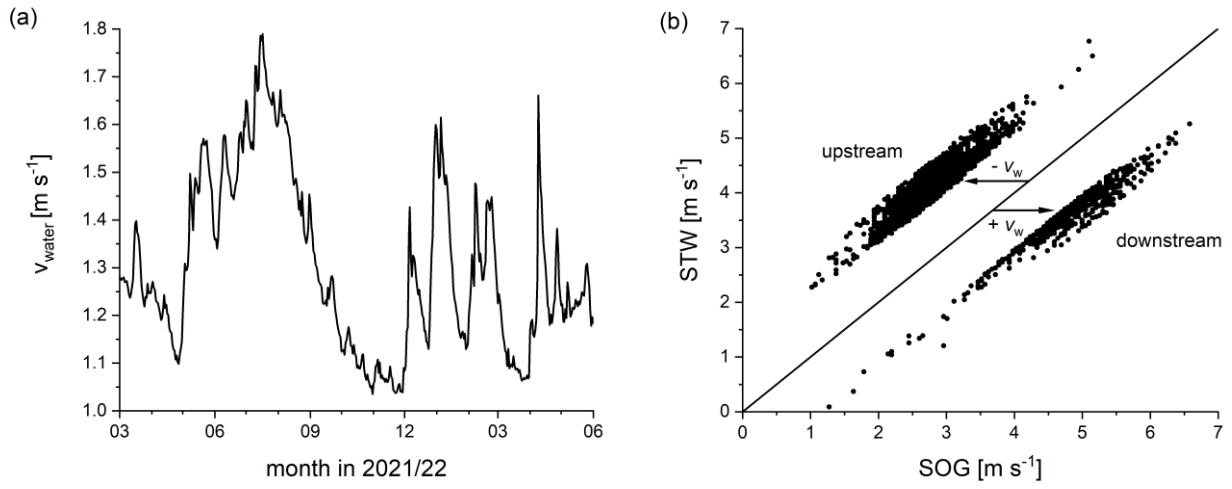

**Figure S3:** (a) Evolution of the velocity of the Rhine ( $v_{\text{water}}$ ) within the measurement period. (b) Comparison of SOG and STW for ships travelling upstream and downstream.

**Table S2:** Standard parameters for the peak identification algorithm which were chosen individually for each instrument.

| Parameter                                              | Default           | 2B<br>NO <sub>x</sub> | 2B<br>NO <sub>2</sub> | O <sub>3</sub> | ICAD<br>NO <sub>x</sub> | ICAD<br>NO <sub>2</sub> | ICAD<br>CO <sub>2</sub> | Licor<br>CO <sub>2</sub> | BC  | FMPS<br>PNC | 11-D<br>PNC | EDM<br>PNC |
|--------------------------------------------------------|-------------------|-----------------------|-----------------------|----------------|-------------------------|-------------------------|-------------------------|--------------------------|-----|-------------|-------------|------------|
| Filter method <sup>a</sup>                             | <b>F, p, T</b>    |                       |                       | -              |                         |                         |                         |                          |     |             |             |            |
| Typ. noise <sup>b</sup> [ <i>x</i> ] (1σ)              |                   | 4                     | 4                     | 1              | 0.4                     | 0.4                     | 1                       | 0.3                      | 0.4 |             |             |            |
| Time resolution [s]                                    |                   | 5                     | 5                     | 2              | 2–3                     | 2–3                     | 2                       | 2–3                      | 1   | 1           | 1           | 6          |
| Window size <sup>c</sup> [min]                         | <b>10</b>         |                       |                       |                |                         |                         |                         |                          |     |             |             |            |
| Threshold interval <sup>d</sup> [s]                    | <b>30</b>         |                       |                       |                |                         |                         |                         |                          |     |             |             |            |
| Threshold factor <sup>e</sup> [σ]                      | <b>4</b>          |                       |                       |                |                         |                         |                         |                          |     |             |             |            |
| Max threshold <sup>f</sup> [ <i>x</i> ]                |                   | 50                    | 40                    | 20             | 50                      | 20                      | 20                      | 20                       | 5   | 20 000      | 40          | 20         |
| Points above thres <sup>g</sup> [s]                    | <b>3</b>          |                       |                       |                |                         |                         |                         |                          |     |             |             |            |
| Time below thres <sup>h</sup> [s]                      | <b>20</b>         |                       |                       |                |                         |                         |                         |                          |     |             |             |            |
| Minimum peak height [ <i>x</i> ]                       |                   | 50                    | 20                    | 10             | 50                      | 10                      | 10                      | 10                       | 2   | 10 000      | 20          | 20         |
| Peak duration [s]:                                     | <b>10–240</b>     |                       |                       |                |                         |                         |                         |                          |     |             |             |            |
| Offset between peak and ship passage <sup>i</sup> [s]: |                   |                       |                       |                |                         |                         |                         |                          |     |             |             |            |
| BRI                                                    | <b>-30 to 120</b> |                       |                       |                |                         |                         |                         |                          |     |             |             |            |
| RIV                                                    | <b>-60 to 240</b> |                       |                       |                |                         |                         |                         |                          |     |             |             |            |

5

<sup>a</sup>Prior to analysis the raw instrument data was screened for flow rate (F), pressure (p) and temperature (T) conditions not in the range specified by the manufacturer. <sup>b</sup>Typical instrumental noise. *x* = unit depending on component, i.e. ppb for NO<sub>x</sub>, NO<sub>2</sub> and O<sub>3</sub>; ppm for CO<sub>2</sub>; μg m<sup>-3</sup> for BC; particles cm<sup>3</sup> for PNC. <sup>c</sup>Window size for background calculation (running median). <sup>d</sup>Interval length before peak start for calculation of the standard deviation to filter out periods with high atmospheric variability. <sup>e</sup>Number of standard deviations (σ) to determine the threshold for peak detection from the threshold interval. <sup>f</sup>Maximum permitted threshold value to filter out periods with increased atmospheric variability. <sup>g</sup>Minimum consecutive data points above the threshold to define the beginning of a peak. <sup>h</sup>Minimum time span below the threshold to define the end of a peak. <sup>i</sup>Temporal offset between the observed peak and the corresponding ship passage determined via AIS position (positive for peak occurring after ship passage).

10

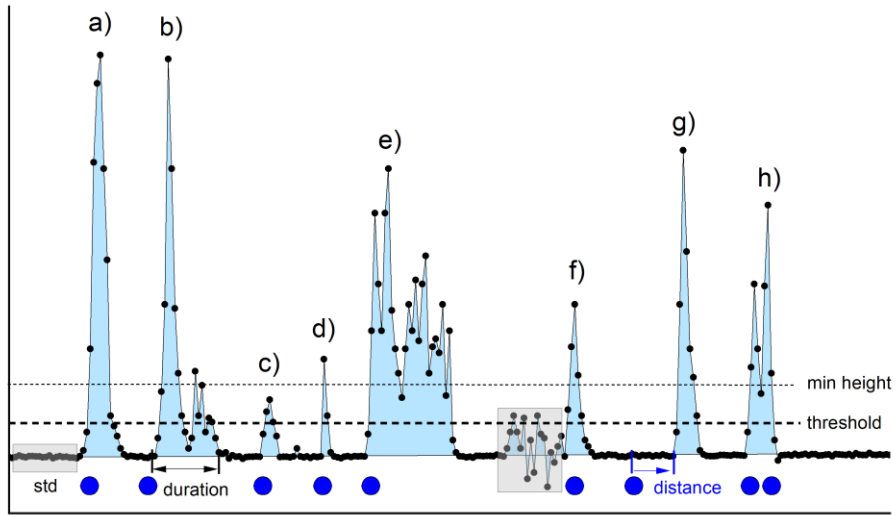

**Figure S4:** Exemplary peaks illustrating certain criteria of the peak identification algorithm according to Sect. 2.3.1 in the manuscript. A description of cases (a) to (h) is given in Table S2 below.

5

**Table S3:** Exemplary cases (a) to (h) belonging to Fig. S4.

| Peak | All criteria fulfilled | peak > minimum height | 3 points or more > threshold | peak duration < 4 min | low atmospheric background noise | distance between ship passage and detected peak < 120 s | not more than 1 ship present within 120 s |
|------|------------------------|-----------------------|------------------------------|-----------------------|----------------------------------|---------------------------------------------------------|-------------------------------------------|
| a)   | yes                    | yes                   | yes                          | yes                   | yes                              | yes                                                     | yes                                       |
| b)   | yes                    | yes                   | yes                          | yes                   | yes                              | yes                                                     | yes                                       |
| c)   | no                     | no                    | yes                          | yes                   | yes                              | yes                                                     | Yes                                       |
| d)   | no                     | yes                   | no                           | yes                   | yes                              | yes                                                     | Yes                                       |
| e)   | no                     | yes                   | yes                          | no                    | yes                              | yes                                                     | yes                                       |
| f)   | no                     | yes                   | yes                          | yes                   | no                               | yes                                                     | yes                                       |
| g)   | no                     | yes                   | yes                          | yes                   | yes                              | no                                                      | yes                                       |
| h)   | no                     | yes                   | yes                          | yes                   | yes                              | yes                                                     | no                                        |

10

**Table S4:** Emission factors (in g per kg fuel), NO<sub>2</sub>-to-NO<sub>x</sub> ratio (calculated for the initial time of emission), geometric mean diameter (GMD) and mode diameter ( $D_{mode}$ ) for stations BRI and RIV.

| <b>BRI</b>         | NO <sub>x</sub> | NO <sub>2</sub> /NO <sub>x</sub><br>(initial) | PM <sub>1</sub>   | BC            | PNC<br>( $\times 10^{15}$ #)              | UFP<br>( $\times 10^{15}$ #)              | GMD<br>(nm) | $D_{mode}$<br>(nm) |
|--------------------|-----------------|-----------------------------------------------|-------------------|---------------|-------------------------------------------|-------------------------------------------|-------------|--------------------|
| Mean $\pm$ std     | 36.8 $\pm$ 15.7 | 0.08 $\pm$ 0.07                               | 1.7 $\pm$ 1.1     | 0.5 $\pm$ 0.3 | 3.5 $\pm$ 5.5                             | 3.2 $\pm$ 5.6                             | 52 $\pm$ 23 | 66 $\pm$ 35        |
| Median             | 33.8            | 0.07                                          | 1.6               | 0.4           | 1.5                                       | 1.0                                       | 55          | 81                 |
| 25-75%             | 26.3 – 43.9     | 0.06 – 0.09                                   | 0.9 – 2.3         | 0.3 – 0.7     | 1.0 – 3.3                                 | 0.7 – 2.9                                 | 31 – 70     | 26 – 93            |
| IQR                | 17.6            | 0.03                                          | 1.4               | 0.4           | 2.3                                       | 2.2                                       | 39          | 67                 |
| min-max            | 1.5 – 184       | 0 – 1                                         | 0 – 13            | 0 – 3.8       | 0 – 92                                    | 0 – 92                                    | 8 – 114     | 6 – 143            |
| N <sub>peaks</sub> | 3123            | 885                                           | 1780              | 1895          | 1780                                      | 1780                                      | 2010        | 2010               |
| <b>RIV</b>         | NO <sub>x</sub> | NO <sub>2</sub> /NO <sub>x</sub><br>(initial) | PM <sub>2.5</sub> | BC            | PN <sub>2.5</sub><br>( $\times 10^{15}$ ) | PN <sub>UFP</sub><br>( $\times 10^{15}$ ) | GMD<br>(nm) | $D_{mode}$<br>(nm) |
| Mean $\pm$ std     | 39.0 $\pm$ 15.7 | -                                             | -                 | -             | -                                         | -                                         | -           | -                  |
| Median             | 43.9            | -                                             | -                 | -             | -                                         | -                                         | -           | -                  |
| 25-75%             | 29.4 – 47.6     | -                                             | -                 | -             | -                                         | -                                         | -           | -                  |
| IQR                | 18.2            | -                                             | -                 | -             | -                                         | -                                         | -           | -                  |
| min-max            | 8.7 – 81        | -                                             | -                 | -             | -                                         | -                                         | -           | -                  |
| N <sub>peaks</sub> | 47              | -                                             | -                 | -             | -                                         | -                                         | -           | -                  |

**Table S5:** Ship classification scheme according to Krause et al. (2022) with emission factors derived in Krause et al. (2022) (converted with suggested fuel consumption scenario) together with  $E_{NO_x}$  (in  $g\ kg^{-1}$ ) and  $E_{PNC}$  (in particles  $kg^{-1}$ ) measured at BRI.

| Ship class | length [m] | width [m] | $N$ (this study) | $E_{NO_x}$ (this study) [ $g\ kg^{-1}$ ] | $N$ (Krause et al.) | $E_{NO_x}$ (Krause et al.) [ $g\ kg^{-1}$ ] | $N$ (this study) | $E_{PNC}$ (this study) [ $10^{15}$ particles $kg^{-1}$ ] |
|------------|------------|-----------|------------------|------------------------------------------|---------------------|---------------------------------------------|------------------|----------------------------------------------------------|
| All        | -          | -         | 3123             | $37 \pm 16$                              |                     |                                             | 1780             | $3.5 \pm 5.5$                                            |
| I          | $\leq 39$  | $\leq 6$  | 13               | $36 \pm 14$                              | 469                 | $45 \pm 3$                                  | 8                | $4.9 \pm 6.5$                                            |
| II         | $\leq 56$  | $\leq 7$  | 19               | $39 \pm 21$                              | 49                  | $44 \pm 9$                                  | 14               | $4.8 \pm 5.9$                                            |
| III        | $\leq 68$  | $\leq 9$  | 27               | $42 \pm 17$                              | 258                 | $39 \pm 3$                                  | 9                | $10.9 \pm 9.3$                                           |
| IV         | $\leq 86$  | $\leq 10$ | 330              | $40 \pm 19$                              | 2608                | $47 \pm 1$                                  | 181              | $5.3 \pm 7.2$                                            |
| Va         | $\leq 111$ | $\leq 12$ | 1550             | $36 \pm 15$                              | 5377                | $50 \pm 1$                                  | 850              | $3.1 \pm 4.2$                                            |
| Vb         | $\leq 136$ | $\leq 12$ | 412              | $36 \pm 16$                              | 1548                | $49 \pm 1$                                  | 260              | $3.3 \pm 5.7$                                            |
| Jowi       | $\leq 136$ | $\leq 18$ | 185              | $35 \pm 14$                              | 1343                | $52 \pm 2$                                  | 110              | $3.9 \pm 6.1$                                            |
| VIa        | $\leq 173$ | $\leq 12$ | 125              | $39 \pm 16$                              | 285                 | $57 \pm 3$                                  | 79               | $2.1 \pm 2.2$                                            |
| VIb        | $\leq 194$ | $\leq 23$ | 408              | $37 \pm 15$                              | 906                 | $58 \pm 2$                                  | 243              | $3.7 \pm 7.5$                                            |
| VIc        | $\leq 194$ | $\leq 35$ | 7                | $38 \pm 11$                              | 280                 | $47 \pm 3$                                  | 3                | $1.1 \pm 0.9$                                            |
